# Supplementary material for: Moloney murine leukemia virus glyco-gag facilitates xenotropic murine leukemia virus-related virus replication through human APOBEC3-independent mechanisms
Source: PubMed Central journal article supplement (PMC3423011; doi:10.1186/1742-4690-9-58), 2012-07-24
Supplement: 1742-4690-9-58-S2.pdf [file 1742-4690-9-58-S2.pdf]

(293T)

(DU145)

XMRV

MX

XMRV

MX

XMRV

MX

XMRV

MX

Glyco-gag →→

Poly-gag →

CA →

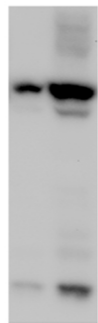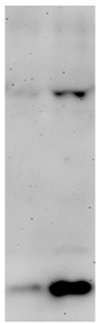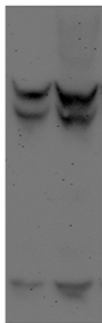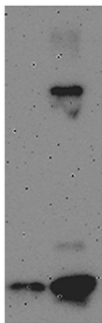

Cell  
lysates

Media

Cell  
lysates

Media
