# Supplementary material for: Moloney murine leukemia virus glyco-gag facilitates xenotropic murine leukemia virus-related virus replication through human APOBEC3-independent mechanisms
Source: PubMed Central journal article supplement (PMC3423011; doi:10.1186/1742-4690-9-58), 2012-07-24

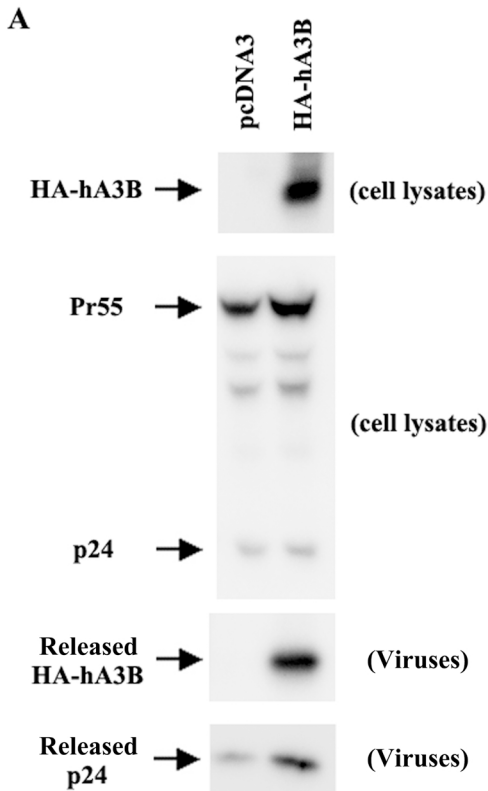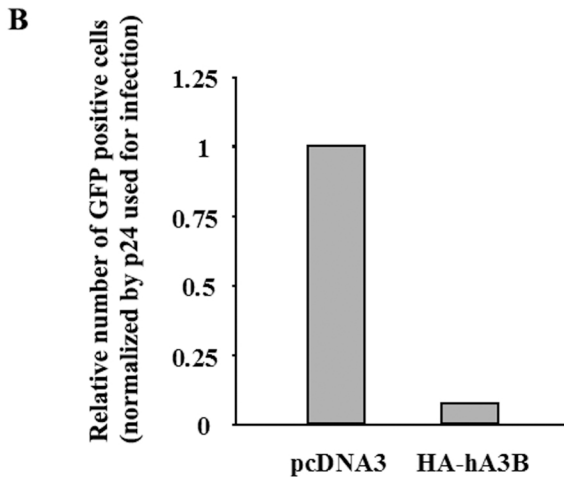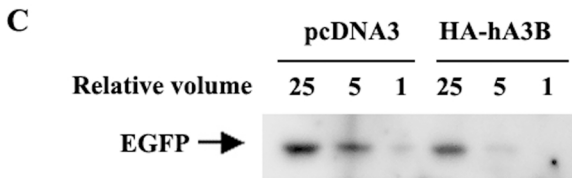

Supplement: 1742-4690-9-58-S4.pdf [file 1742-4690-9-58-S4.pdf]
